# Supplementary material
Source: PubMed Central journal article supplement (PMC524051)
Supplement: pnas_101_42_15064__2.pdf [file pnas_101_42_15064__2.pdf]

**Table 2. Summary of HDAC8 diffraction data and refinement statistics**

| X-ray diffraction data           |                    |
|----------------------------------|--------------------|
| Data type                        | Native2            |
| Space group                      | $P2_1$             |
| Cell constants, Å                |                    |
| <i>a</i>                         | 51.746             |
| <i>b</i>                         | 83.532             |
| <i>c</i>                         | 94.653             |
| $\beta$                          | 97.485             |
| Wavelength                       | 0.9340             |
| Resolution, Å*                   | 50–2.5 (2.65–2.50) |
| $R_{\text{sym}}$ , † %           | 6.3 (44.9)         |
| $\langle I/\sigma I \rangle$ ‡   | 9.2 (1.3)          |
| Number of observations           | 184,029            |
| Number of unique observations    | 27,172             |
| Completeness, %                  | 98.1 (98.7)        |
| Refinement statistics            |                    |
| Resolution, Å                    | 50–2.5             |
| <i>R</i> factor§                 | 0.21               |
| $R_{\text{free}}$ ¶              | 0.25               |
| rmsd ¶¶ bond lengths, Å          | 0.007              |
| rmsd bond angles, Å              | 1.413              |
| Overall B-factor, Å <sup>2</sup> | 42.32              |
| $\phi\psi$ angle distribution**  |                    |
| In core region                   | 513 (85.5)         |
| In allowed region                | 87 (14.5)          |
| In disallowed region             | 0 (0)              |
| Number of atoms                  |                    |
| Protein                          | 5,478              |
| Inhibitor                        | 52                 |

|         |     |
|---------|-----|
| Ions    | 6   |
| Solvent | 280 |

\*Highest resolution of the data set with the highest-resolution bin in parentheses.

<sup>†</sup> $R_{\text{sym}} = \sum_h \sum_i | \langle I_h \rangle - I_i(h) | / \sum_h \sum_i I_i(h)$ , where  $I_i(h)$  is the mean intensity of the  $N$  reflection.

<sup>‡</sup>Mean ( $I$ )/SD.

<sup>§</sup> $R$  factor =  $\sum_h |F_o - F_c| / \sum_h |F_o|$ .

<sup>¶</sup> $R_{\text{free}}$  is calculated from 5% of the data that were omitted during the course of the refinement.

<sup>||</sup> From ideal geometry.

\*\*As defined by PROCHECK (8), the percentage distribution is given in parentheses.
