# Supplementary material
Source: PubMed Central journal article supplement (PMC524051)

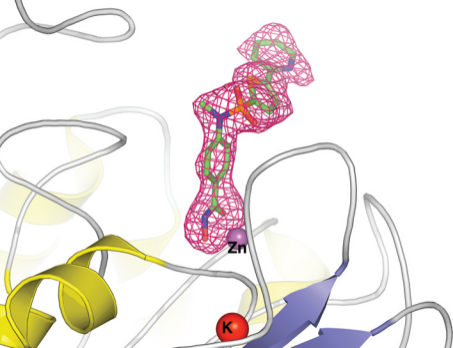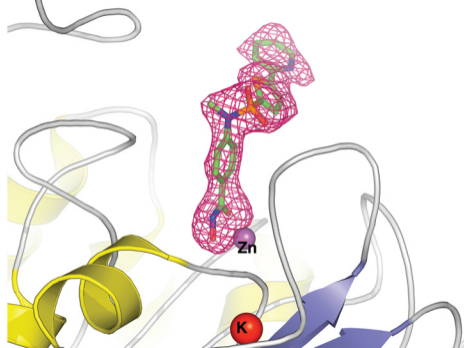

Supplement: pnas_101_42_15064__3.pdf [file pnas_101_42_15064__3.pdf]

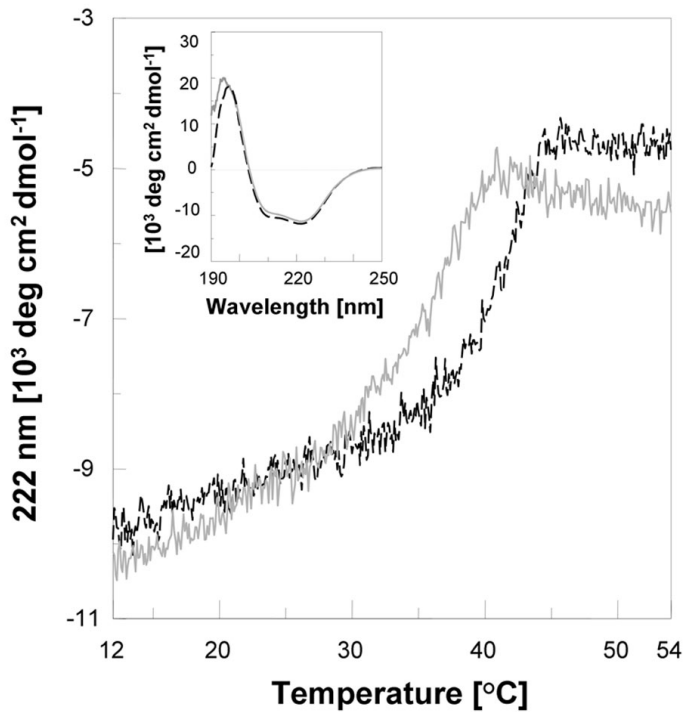

Supplement: pnas_101_42_15064__4.pdf [file pnas_101_42_15064__4.pdf]
